# Supplementary material for: The Phytochrome-Interacting Factor OsPIL11 Coordinates Grain Weight and Grain Number via Directly Regulating the Expression of OsMIR530 and OsCKX2 in Rice
Source: Research Square preprint supplement (doi:10.21203/rs.3.rs-7350390/v1), 2025-08-25
Supplement: Supplementary file 1 [file ddc33705589577a011515afa.docx]

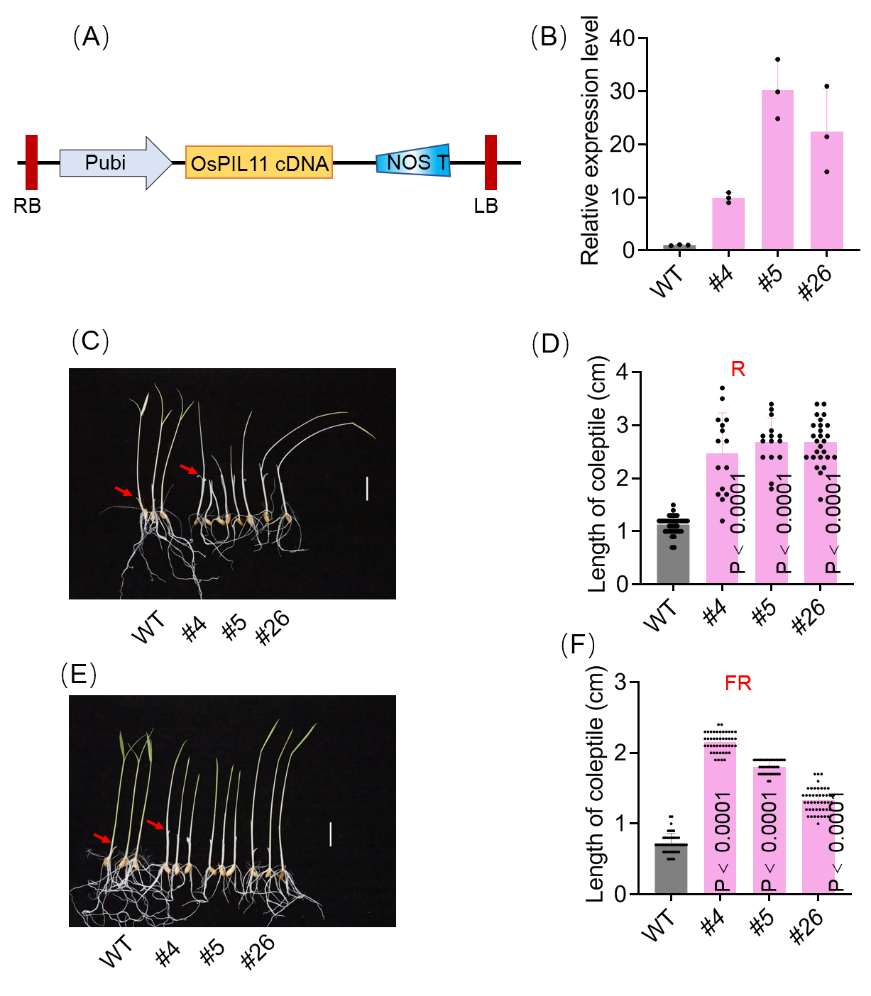


Fig.S1 *OsPIL11* plays important roles in red light-mediated signal transduction pathways. (A) Schematic diagrams show the construct used for overexpression transformation. (B) The relative expression level of *OsPIL11*. (C) The phenotype of seedlings with red light treatment. (D) The length of coleoptile with red light treatment. (E) The phenotype of seedlings with far-red light treatment. (F) The length of coleoptile with far red light treatment. R: red light, FR: far red light. The red arrow indicates the coleoptile position.


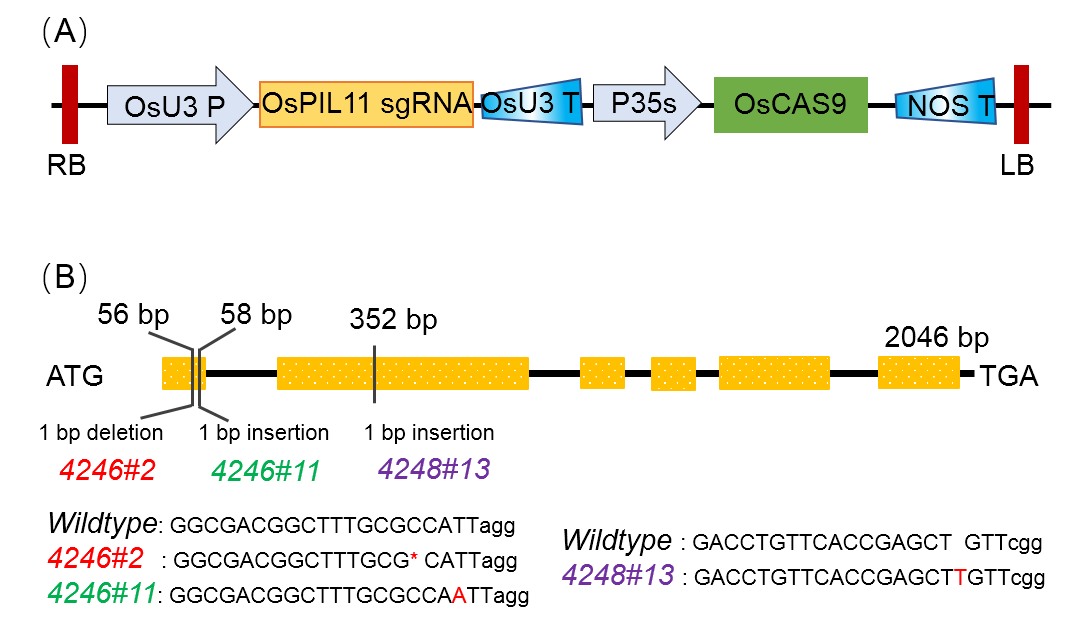


Fig. S2 Development of the knock-out (KO) lines of *OsPIL11*. (A) Schematic diagrams of the construct used for developing *OsPIL11* KO lines. (B) Schematic representation of *OsPIL11* mutations in the three independent KO lines.


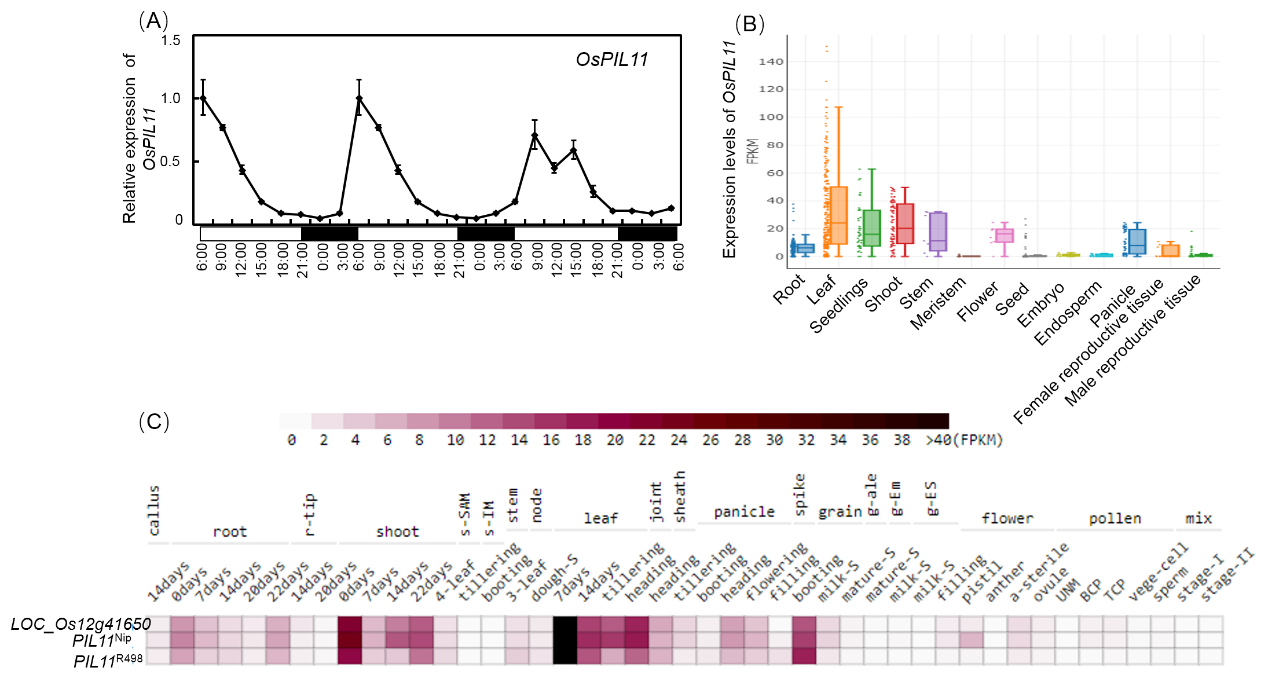


Fig. S3 Expression patterns of *OsPIL11* in rice. (A) Relative expression of *OsPIL11* in photoperiodic conditions. (B) Expression levels of *OsPIL11* among different tissues from REPD. (C) Expression levels of *OsPIL11* among different tissues from Rice RNA-seq Database.


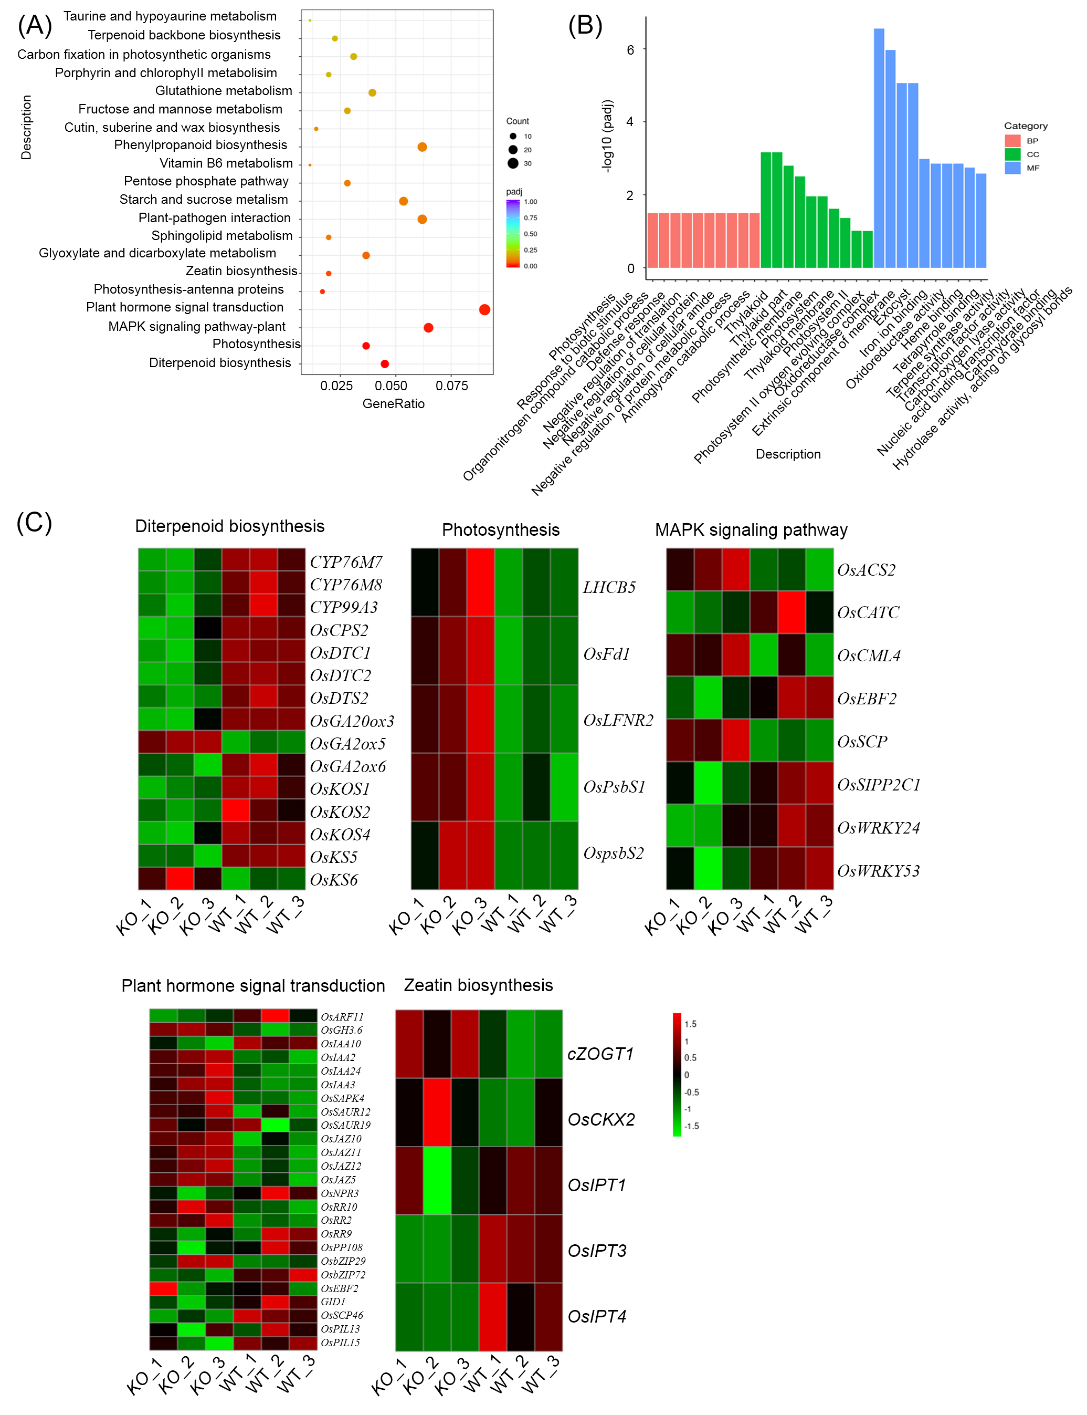


Fig. S4 Deﬁciency of *OsPIL11* results in changes in several biological processes. (A) KEGG analysis of DEGs. (B) GO analysis of DEGs. (C) Expression levels of *OsPIL11* among different tissues from Rice RNA-seq Database. Expression levels of various genes regulated by OsPIL11. Heatmaps show the fold changes in expression of gene involved in diterpenoid, photosynthesis, MAPK signaling pathway, plant hormone transduction. Log2 (fold changes) are represented by a colour scale from green (down-regulated expression) to red (up-regulated expression).


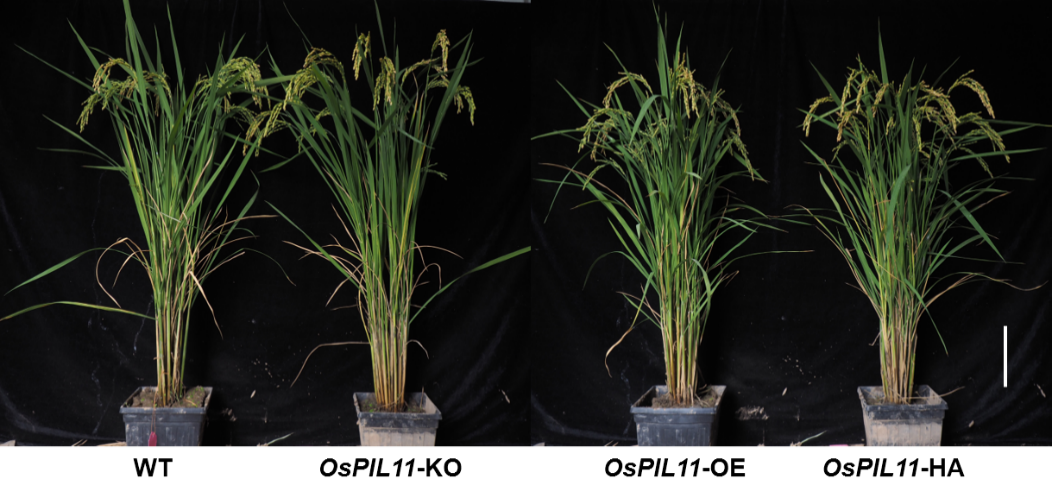


Fig.S5 Phenotypes of *OsPIL11* OE and HA transgenic lines. Bars (A) = 10 cm.

Fig.S6 Quantitative real-time (qRT)-PCR analysis of several potential target genes from chromatin immunoprecipitation.


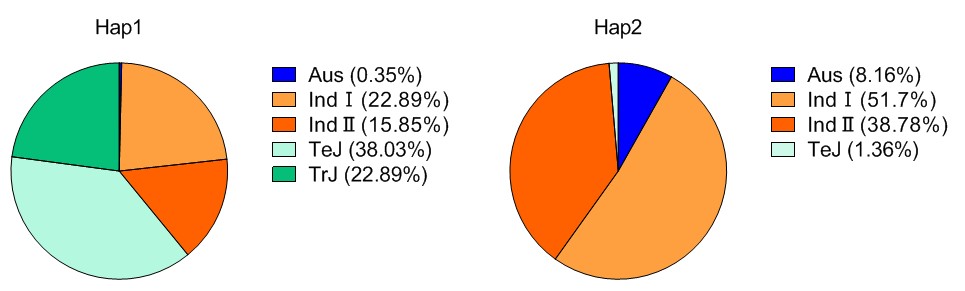


Fig.S7 Distribution frequency of cultivated rice subpopulations across the different haplotypes.


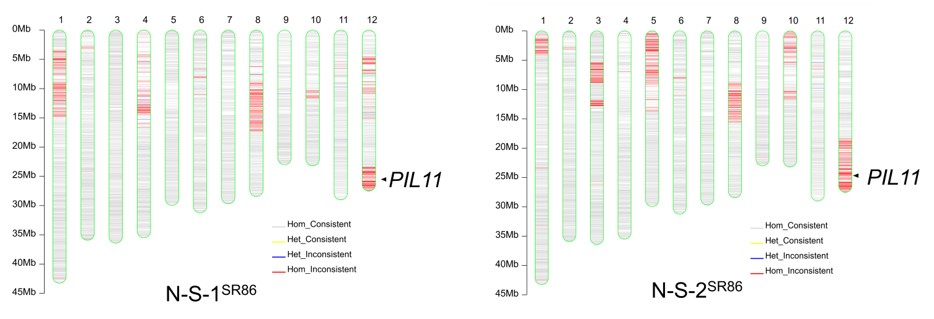


Fig.S8 The schematic drawing of two CSSLs with substitution segments of HD86. The gray and yellow lines represent NIP genomic homozygous and heterozygous fragments, respectively. The red and blue lines represent SR86 genomic homozygous and heterozygous fragments, respectively. The arrows represented location of *OsPIL11*.

Table.S1 Several DEGs related to grain size and panicle development.

Table.S2 DEGs list related to complex regulatory networks influencing rice grain yield.

Table.S3 Primers used in this study.
