# Supplementary material for: The Phytochrome-Interacting Factor OsPIL11 Coordinates Grain Weight and Grain Number via Directly Regulating the Expression of OsMIR530 and OsCKX2 in Rice
Source: Research Square preprint supplement (doi:10.21203/rs.3.rs-7350390/v1), 2025-08-25
Supplement: Supplementary file 2 [file e0790da29308bf4ada359422.xlsx]

## Sheet: Table S1
Supplemental Table S1: Several DEGs related to grain size and panicle development
gene_name	gene_id	WT_a	WT_b	WT_c	P11_a	P1_b	P11_c
OsCKX2	Os01g0197700	4.85428	3.13643	7.46277	1.10937	1.61645	1.58625
SCP46	Os10g0101200	166.713	118.599	131.428	87.668	99.3257	91.3022
WRKY53	Os05g0343400	64.5425	17.4742	27.1503	21.9586	22.133	23.735
OsPIL15	Os01g0286100	10.4803	5.96433	5.09185	9.51263	11.2738	11.4233
JAZ10	Os03g0181100	24.6507	6.78097	5.22496	5.1973	4.86911	5.62438
JAZ11	Os03g0180900	4.10254	4.10962	9.62317	6.45484	5.51784	5.34092
WRKY24	Os01g0826400	7.07164	2.21656	3.1899	5.04114	4.93396	4.75004
Note: WT_a, WT_b, WT_c represent three biological replicates of the wild type; P11_a, P11_b, P11_c represent three biological replicates of the OsPIL11 mutant. The values correspond to log2-transformed ratios of gene expression levels between the treatment versus control groups within a given comparison set.

## Sheet: Table S2
Supplemental Table S2: DEGs of complex regulatory networks influencing rice grain yield
Diterpenoid biosynthesis
gene_id	WT_a	WT_b	WT_c	P11_a	P1_b	P11_c
Os02g0571100	135.607	150.695	103.651	43.2614	40.7515	62.7264
Os06g0569500	121.437	178.673	108.487	46.8263	40.7234	57.3854
Os02g0569400	56.9793	94.58	53.3968	26.1526	19.7616	32.2414
Os02g0569900	55.7356	56.9553	50.0025	18.9794	19.8535	36.3465
Os04g0178400	61.3381	56.0094	55.9648	18.5129	15.1681	28.2602
Os02g0570400	50.0159	54.2034	45.6061	11.9984	12.2573	21.0312
Os04g0179700	34.9716	54.015	36.0278	10.4438	8.05928	10.1894
Os11g0474800	21.3023	21.1204	21.0173	8.01756	7.64368	14.0074
Os04g0522500	2.32115	3.51399	3.1193	11.0324	14.1249	14.8689
Os02g0571800	11.904	14.8185	9.69837	7.06221	6.70394	4.99162
Os06g0569900	11.8637	13.2542	7.92612	2.77222	3.58031	4.27263
Os02g0571300	7.71177	6.54107	6.057	5.26599	4.94743	5.22754
Os06g0568600	8.62853	6.57123	7.07809	1.66537	1.45505	4.05443
Os07g0169700	3.18681	3.37168	3.57377	0.858883	0.867544	0.341755
Os07g0103500	0.0953833	0.183783	0.169031	0.329048	0.529859	0.300049
Photosynthesis
Os11g0242800	433.147	501.752	478.336	570.125	679.416	903.444
Os08g0104600	328.211	417.188	395.661	606.808	761.519	931.425
Os01g0869800	212.967	283.63	235.809	460.231	541.543	772.369
Os04g0690800	87.3239	149.806	74.7486	254.389	261.339	421.832
Os06g0107700	3.54934	3.66365	3.63166	4.98033	8.89816	9.02643
MAPK signaling pathway
Os03g0131200	120.238	130.229	95.088	184.91	225.968	299.47
Os07g0129200	263.444	442.134	203.65	139.422	158.9	188.548
Os02g0200900	36.9926	53.9982	38.5457	56.5234	54.0188	67.761
Os05g0343400	64.5425	17.4742	27.1503	21.9586	22.133	23.735
Os09g0325700	4.49314	5.19438	4.56972	8.5588	8.13901	11.5308
Os01g0826400	7.07164	2.21656	3.1899	5.04114	4.93396	4.75004
Os03g0743500	4.83497	6.36312	5.75673	3.02604	3.10933	4.70974
Os05g0474800	4.14934	4.72394	5.56924	2.95035	0.911328	2.16959
Plant hormone signal transduction
Os01g0869900	119.381	108.928	116.717	142.917	147.329	139.311
Os02g0817600	136.247	111.321	120.199	90.5902	72.8096	61.4922
Os02g0557800	71.5337	78.3415	62.4168	109.284	121.396	133.234
Os12g0139400	76.134	61.5997	62.4838	112.561	113.867	162.177
Os03g0782500	38.5604	31.3659	32.8537	64.9654	93.9078	105.626
Os11g0143300	58.3645	57.0327	49.1755	92.6015	95.0681	142.841
Os02g0200900	36.9926	53.9982	38.5457	56.5234	54.0188	67.761
Os07g0182400	47.9296	39.3444	42.9294	46.7989	44.3992	46.5945
Os05g0407500	22.3358	30.8244	24.7838	37.0458	37.3929	42.2622
Os02g0769100	21.9511	27.6859	19.7303	36.5534	48.9738	50.7441
Os04g0537100	20.4475	26.9316	19.811	37.0639	44.103	53.1736
Os09g0456200	20.6502	23.0231	19.5564	26.5237	28.8457	27.7664
Os10g0392400	19.6331	33.6528	22.5095	18.2663	11.8527	16.1801
Os01g0286100	10.4803	5.96433	5.09185	9.51263	11.2738	11.4233
Os09g0325700	4.49314	5.19438	4.56972	8.5588	8.13901	11.5308
Os03g0181100	24.6507	6.78097	5.22496	5.1973	4.86911	5.62438
Os03g0180900	4.10254	4.10962	9.62317	6.45484	5.51784	5.34092
Os01g0190300	5.58939	5.75672	6.31314	6.37435	9.65446	9.82765
Os03g0322700	3.22132	3.41181	4.65374	2.13397	2.33408	1.7423
Os12g0601400	3.16695	3.35676	2.63858	4.2668	2.57802	3.04141
Os05g0143800	1.79768	2.71076	1.9853	1.43804	1.02625	1.49757
Os03g0667100	3.25001	2.57868	2.18284	1.08393	1.57702	1.12126
Os04g0395800	1.6749	3.90224	2.49111	2.26992	0.906248	2.77123
Os10g0101200	166.713	118.599	131.428	87.668	99.3257	91.3022
Os04g0664400	1.85285	1.49551	1.98737	1.43376	0.897004	0.573691
Zeatin biosynthesis
Os01g0197700	4.85428	3.13643	7.46277	1.10937	1.61645	1.58625
Os03g0810100	0.230286	0.190162	0.524694	0.510704	1.17126	0.451583
Os04g0556500	2.62231	3.59141	3.20194	3.51188	0.62984	1.81076
Os05g0311801	1.92886	1.59279	1.37677	0.308059	0.284108	0.45967
Os03g0358900	3.17471	0.735877	1.57922	0.0640464	0	0
Note: WT_a, WT_b, WT_c represent three biological replicates of the wild type; P11_a, P11_b, P11_c represent three biological replicates of the OsPIL11 mutant. The values correspond to log2-transformed ratios of gene expression levels between the treatment versus control groups within a given comparison set.

## Sheet: Table S3
Supplemental Table S3: Primers used in this study.
Primer name	Primer sequence (5’–3’)
Plant transformation
ONAC005_cds-F	ATGGAGAGGGCGGCTGCGGC
ONAC005_cds-R	GCCGCTGCTGACCTCTTCCT
35S promoter_F	CTATCCTTCGCAAGACCCTTC
OsPIL11-OX-F	ATGGATCCATGAACCAGTTCGTCCC
OsPIL11-OX-R	ATACTAGTCAGGAGTCAGCGGCTG
OsPIL11-HA-p1390-F	AAGGATCCATGAACCAGTTCGTCCCTG
OsPIL11-HA-p1390-R	ATACTAGTGGAGTCAGCGGCTGC
qRT-PCR
OsPIL11-F	CAACTAGCATCTCCTCCTCTACTTG
OsPIL11-R	CTCTTTCTCTTTGAGCTGAGATGAC
Subcellular localization
pPIL11-pIG121-Hm-F	ATCTCGAGTTGTTGAAAATCACCTTTGATCATTC
pPIL11-pIG121-Hm-R	ATCTAGAGGCATTAACAACCCTAATTAATCAC
OsPIL11-pBI221-GFP-F	AATCTAGATGAACCAGTTCGTCCCTG
OsPIL11-pBI221-GFP-R	ATGGATCCAGGAGTCAGCGGCTGC
Chip-seq
p530Chip-AF	GCTTTTGGCTACATCTACAT
p530Chip-AR	CGGTTCACATGGGACTTG
pCKX2Chip-F	AGGCCAGCGGCAAATAAA
pCKX2Chip-R	GCACCGACATGTAGATCTTTGA
Y1H assay
pCKX2-pLacZ-1F	ATCTGTCGACCTCGAGACCTCCAGCAGCGACA
pCKX2-pLacZ-1R	GAGCACATGCCTCGAGGGATCCATGATTTTATTTGC
pCKX2-pLacZ-2F	ATCTGTCGACCTCGAGGCCAGCGGCAAATAAA
pCKX2-pLacZ-2R	GAGCACATGCCTCGAGAGGCGGATTCGTAGCG
pCKX2-pLacZ-3F	ATCTGTCGACCTCGAGTGACCATTCGTCTTAT
pCKX2-pLacZ-3R	GAGCACATGCCTCGAGCTACTCCATCCGTTTC
pCKX2-pLacZ-4F	ATCTGTCGACCTCGAGTTTCCTCGGTCCATCT
pCKX2-pLacZ-4R	GAGCACATGCCTCGAGATTGTTTCGGTGCTGT
pCKX2-pLacZ-5F	ATCTGTCGACCTCGAGTCATGAATGGTTTTCG
pCKX2-pLacZ-5R	GAGCACATGCCTCGAGGGTAATTAAAGTCGATAT
pCKX2-pLacZ-6F	ATCTGTCGACCTCGAGCTCAAGTCTCGGTCAC
pCKX2-pLacZ-6R	GAGCACATGCCTCGAGTCTTGCACCATTGTAG
pM530-pLacZ-F	ATCTGTCGACCTCGAGCCAAATCCGACAGAACGAA
pM530-pLacZ-R	GAGCACATGCCTCGAGACATCGCCACGGTTCACA
EMSA assay
MProbe B-F	CATTGTTGCTAGCTAACTGATCCACGTGTAAACCGGCACGTGTCGCCGTGCCATTGGCCT
MProbe B-R	AGGCCAATGGCACGGCGACACGTGCCGGTTTACACGTGGATCAGTTAGCTAGCAACAATG
MProbe Bm-F	CATTGTTGCTAGCTAACTGATCTGATCTTAAACCGGTGATCTTCGCCGTGCCATTGGCCT
MProbe Bm-R	AGGCCAATGGCACGGCGAAGATCACCGGTTTAAGATCAGATCAGTTAGCTAGCAACAATG
CProbe B-F	ATCATGGATCCGTGGATCGATCGAACGTGCGTTTGGCTGTCACCACGATCGATCAACG
CProbe B-R	CGTTGATCGATCGTGGTGACAGCCAAACGCACGTTCGATCGATCCACGGATCCATGAT
CProbe Bm-F	ATCATGGATCCGTGGATCGATCGGCATCTAGTTTGGCTGTCACCACGATCGATCAACG
CProbe Bm-R	CGTTGATCGATCGTGGTGACAGCCAAACTAGATGCCGATCGATCCACGGATCCATGAT
Note: F represent Forward, R represent Reverse
